# Supplementary material
Source: HighWire-hosted journal article supplement (https://cmajopen.ca/highwire/filestream/81056/field_highwire_adjunct_files/0/2017-0129-1-at.pdf)
Supplement: 2017-0129-1-at.pdf [file 2017-0129-1-at.pdf]

**Appendix 1 (as supplied by the authors):** Provisional list of essential medicines for children in Canada

| WHO Class of Medicines                          | Medicines                                                                                                                                                                                                                                                                                                     |
|-------------------------------------------------|---------------------------------------------------------------------------------------------------------------------------------------------------------------------------------------------------------------------------------------------------------------------------------------------------------------|
| Antiallergics and medicines used in anaphylaxis | Epinephrine                                                                                                                                                                                                                                                                                                   |
| Anticonvulsive medication                       | Carbamazepine<br>Phenytoin<br>Valproic Acid                                                                                                                                                                                                                                                                   |
| Anti-infective medicines                        | Acabavir<br>Amoxicillin<br>Amoxicillin/Clavulanic Acid<br>Azithromycin<br>Cephalexin<br>Ciprofloxacin<br>Clindamycin<br>Cloxacillin<br>Doxycycline<br>Efavirenz<br>Emtricitabine<br>Fluconazole<br>Lamivudine<br>Metronidazole<br>Nitrofurantoin<br>Nystatin<br>Sulfamethoxazole/Trimethoprim<br>Trimethoprim |
| Immunosuppressives                              | Azathioprine<br>Hydroxyurea<br>Prednisone                                                                                                                                                                                                                                                                     |
| Dermatological (topical)                        | Benzoyl Peroxide<br>Betamethasone<br>Hydrocortisone<br>Permethrin<br>Salicylic Acid<br>Tacrolimus<br>Urea                                                                                                                                                                                                     |

|                                                         |                                                                                                                                                                      |
|---------------------------------------------------------|----------------------------------------------------------------------------------------------------------------------------------------------------------------------|
| Diuretics                                               | Furosemide<br>Spironolactone                                                                                                                                         |
| Gastrointestinal medicines                              | Metoclopramide<br>Ranitidine<br>Senna                                                                                                                                |
| Hormones, other endocrine medicines, and contraceptives | Dexamethasone<br>Growth hormone<br>Glucagon<br>Insulin, Long Acting<br>Insulin, Short Acting<br>Levothyroxine<br>Metformin<br>Pancreatic enzymes<br>Propylthiouracil |
| Medicines acting on the respiratory tract               | Budesonide<br>Fluticasone<br>Salbutamol                                                                                                                              |
| Medicines affecting the blood                           | Ferrous Sulphate<br>Filgrastim<br>Folic Acid<br>Warfarin                                                                                                             |
| Medicines for diseases of joints                        | Allopurinol<br>Methotrexate                                                                                                                                          |
| Medicines for mental and behavioural disorders          | Diazepam<br>Fluoxetine<br>Haloperidol<br>Methylphenidate                                                                                                             |
| Medicines for pain and palliative care                  | Acetaminophen<br>Acetylsalicylic Acid<br>Ibuprofen<br>Morphine                                                                                                       |
| Vitamins and minerals                                   | Potassium<br>Thiamine<br>Vitamin B12<br>Vitamin D                                                                                                                    |

**Supplementary Table S1: Country Lists**

|                                     | <b>EML or formulary</b> | <b># of medicines</b> | <b>Development process presented</b> |
|-------------------------------------|-------------------------|-----------------------|--------------------------------------|
| <b>Canada (provisional)</b>         | EML                     | 64                    | --                                   |
| <b>Democratic Republic of Congo</b> | EML                     | 48                    | No                                   |
| <b>Egypt</b>                        | Formulary               | 4                     | No                                   |
| <b>India</b>                        | EML                     | 134                   | Yes                                  |
| <b>Kiribati</b>                     | Formulary               | 21                    | No                                   |
| <b>Netherlands</b>                  | Formulary               | 726                   | Yes                                  |
| <b>New Zealand</b>                  | Formulary               | N/A                   | N/A                                  |
| <b>South Africa</b>                 | EML                     | 249                   | Yes                                  |
| <b>Togo</b>                         | EML                     | 219                   | No                                   |
| <b>United Kingdom</b>               | Formulary               | over 1000             | Yes                                  |
